# Supplementary material
Source: PubMed Central journal article supplement (PMC4101811)
Supplement: NIHMS606320-supplement-1.pdf [file NIHMS606320-supplement-1.pdf]

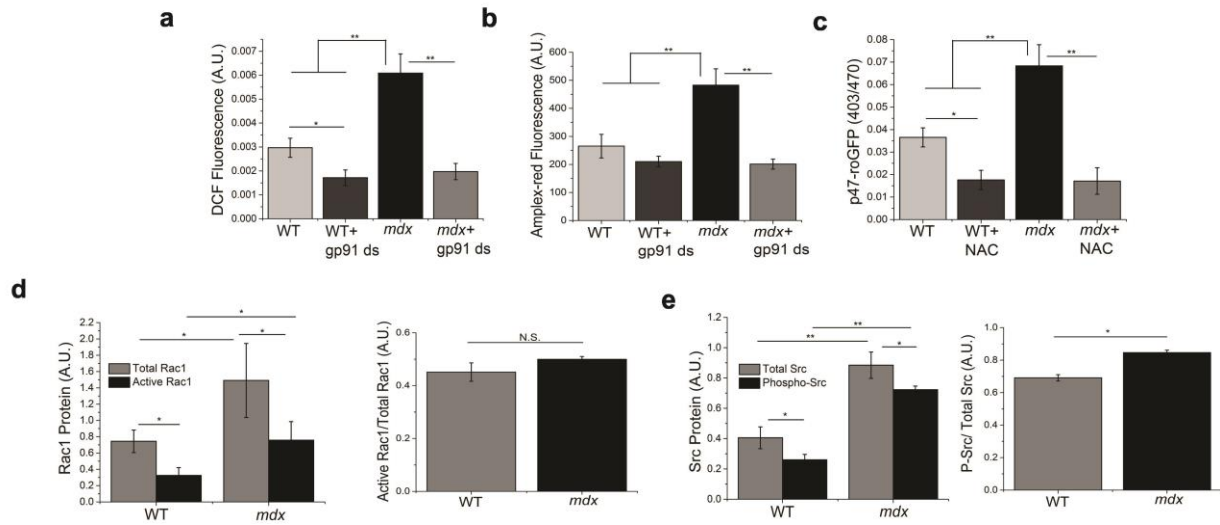

**Supplementary Figure 1. Inhibition of Nox2 activity decreases ROS production. (a)**

Intracellular ROS production was assessed using DCF-DA dye. **(b)** Extracellular ROS ( $H_2O_2$ )

generation was measured using Amplex-red dye. **(c)** Nox2-specific ROS production was

assessed using the p47-roGFP redox biosensor. **(d)** Western blot analysis was done to detect

Rac1 protein level. **(e)** Immunoblot analysis was done to detect Src protein level. All above

analyses were done in enzymatically digested single FDBs from WT and *mdx* mice. Bar

diagrams for **a**, **b** and **c** represent  $\pm$ SEM from n=15 individual fibers for each conditions. Bar

diagrams for **(d)** and **(e)** represent  $\pm$ SEM from n=3 independent biological experiments.

NS=non-significant. NAC: N-Acetyl Cysteine

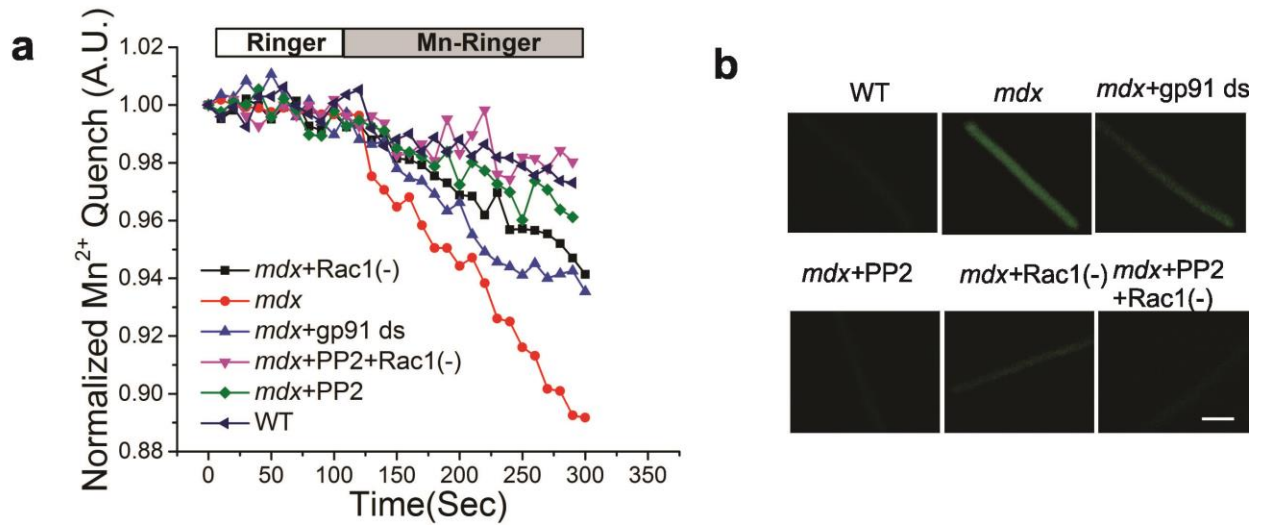

**Supplementary Figure 2. Inhibition of Nox2 activity decreases calcium influx and subsequent RNS production.** (a) Plasma membrane calcium influx was measured in enzymatically digested single FDBs from WT and *mdx* mice by analyzing the quench of Fura-2 fluorescence upon addition of extracellular  $Mn^{2+}$ . Representative line-plot profiles from n=15 fibers per conditions are shown. (b) Intracellular RNS was assessed in enzymatically digested single FDBs from WT and *mdx* mice using DAF-FM dye. Representative fluorescence images are shown. Scale bar represents 200  $\mu m$ .

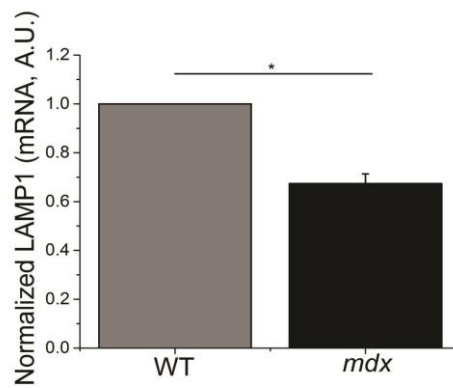

**Supplementary Figure 3. LAMP1 mRNA levels are higher in *mdx* mice compared to WT mice.** q-RTPCR analysis of RNA extracted from FDBs shows LAMP1 expression in RNA level in WT and *mdx* mice. Bar diagram represents  $\pm$ SEM from n=3 independent biological experiments.

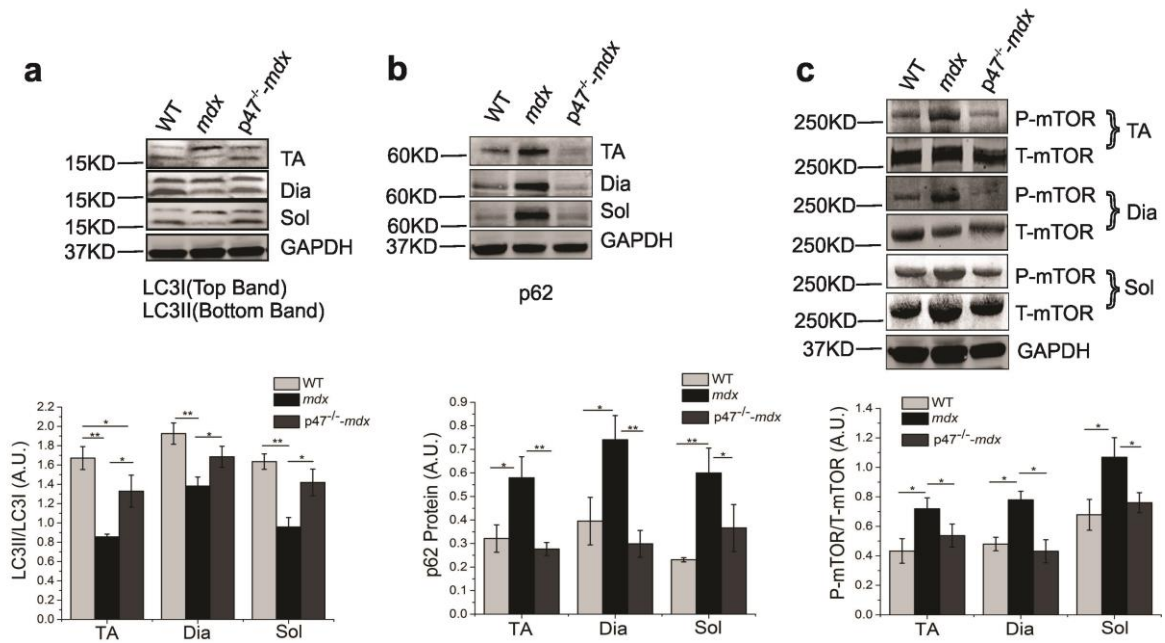

**Supplementary Figure 4. Genetic inhibition of Nox2 activity restores autophagy markers in *mdx* mice.** (a) Immunoblot analysis was done to detect LC3B protein level. (b) Immunoblot analysis was done to detect p62 protein level. (c) Immunoblot analysis was done to detect P-mTOR and mTOR protein levels. **a**, **b** and **c** are done in isolated proteins from TA of WT, *mdx* and *p47<sup>-/-</sup>-mdx* mice. Representative immunoblot images are shown. Bar diagrams represent  $\pm$ SEM from n=3 independent biological experiments.

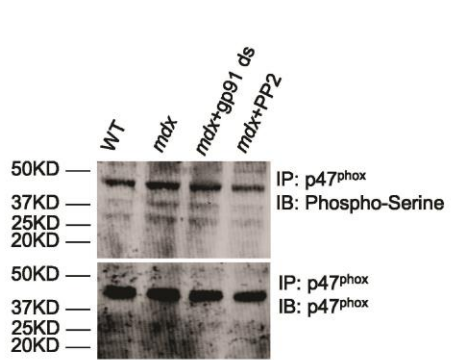

Figure 1e

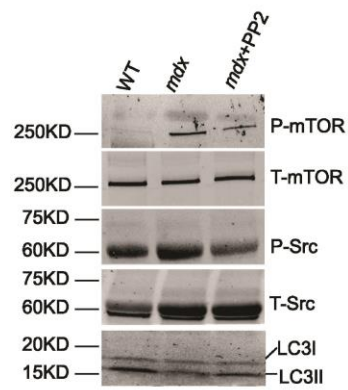

Figure 1j

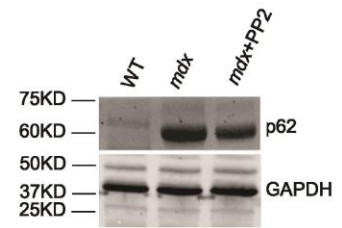

Figure 1j

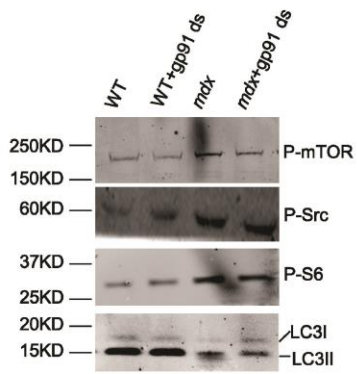

Figure 2a&c

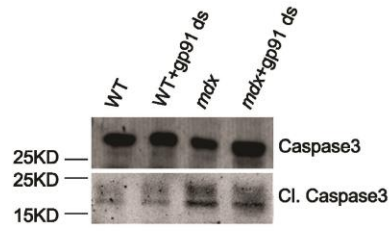

Figure 2g

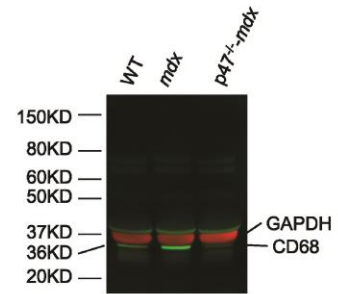

Figure 4b

**Supplementary Figure 5. Representative uncropped westernblots.**

**Supplementary Table 1 Antibody dilutions**

| <b>Antibody</b>          | <b>Company</b>                 | <b>Dilution</b> |
|--------------------------|--------------------------------|-----------------|
| Anti-active Rac1         | Millipore                      | 1:200           |
| Anti-Rac1                | Abcam                          | 1:1000          |
| GAPDH                    | Millipore                      | 1:1000          |
| Anti-p47 <sup>phox</sup> | Millipore                      | 1:500           |
| Anti-P-serine            | Millipore                      | 1:500           |
| Anti-P-mTOR              | Cell Signalling                | 1:500           |
| Anti-T-mTOR              | Cell Signalling                | 1:500           |
| Anti-P-Src               | Cell Signalling                | 1:500           |
| Anti-p62                 | Santa Cruz-<br>Biotechnologies | 1:500           |
| Anti-LC3B                | Cell Signalling                | 1:1000          |
| Anti-P-PI3K              | Cell Signalling                | 1:500           |
| Anti-T-PI3K              | Cell Signalling                | 1:500           |
| Anti-P-Akt               | Cell Signalling                | 1:1000          |
| Anti-T-Akt               | Cell Signalling                | 1:1000          |
| Anti-P-p70S6             | Cell Signalling                | 1:1000          |
| Anti-T-p70S6             | Cell Signalling                | 1:1000          |
| Anti-P-S6                | Cell Signalling                | 1:1000          |
| Anti-T-S6                | Cell Signalling                | 1:1000          |
| Anti-LAMP1               | Cell Signalling                | 1:1000          |
| Anti-PARP1               | Cell Signalling                | 1:500           |
| Anti-Caspase3            | Cell Signalling                | 1:500           |
| Anti-Cl.Caspase3         | Cell Signalling                | 1:500           |

|                       |                                                   |        |
|-----------------------|---------------------------------------------------|--------|
| CD68                  | BioLegend                                         | 1:1000 |
| Anti-Type I (BA-F8)   | Developmental<br>Studies Hybridoma<br>Bank (DSHB) | 1:100  |
| Anti-Type IIA (SC-71) | Developmental<br>Studies Hybridoma<br>Bank (DSHB) | 1:100  |
